# Supplementary material for: Diruthenium complexes as pH-responsive delivery systems: a quantitative assessment
Source: Royal Society of Chemistry journal article supplement (doi:10.1039/d3qi00399j), 2023-01-01
Supplement: d3qi00399j1.pdf [file d3qi00399j1.pdf]

## SUPPLEMENTARY INFORMATION

### Diruthenium complexes as pH-responsive delivery systems: a quantitative assessment

Isabel Coloma,<sup>a</sup> Miguel Cortijo,<sup>\*a</sup> María José Mancheño,<sup>b</sup> María Eugenia León-González,<sup>c</sup> Crisanto Gutierrez,<sup>d</sup> Bénédicte Desvoyes,<sup>\*d</sup> and Santiago Herrero<sup>\*a</sup>

<sup>a</sup> *Inorganic Chemistry Department, Faculty of Chemistry, Universidad Complutense de Madrid, E-28040 Madrid, Spain.*

<sup>b</sup> *Organic Chemistry Department, Faculty of Chemistry, Universidad Complutense de Madrid, E-28040 Madrid, Spain*

<sup>c</sup> *Analytical Chemistry Department, Faculty of Chemistry, Universidad Complutense de Madrid, E-28040 Madrid, Spain*

<sup>d</sup> *Centro de Biología Molecular Severo Ochoa, CSIC-UAM, E-28049 Madrid, Spain.*

#### 1. SINGLE CRYSTAL X-RAY DIFFRACTION

- Table S1. Crystal and structure refinement data for **Ru'2,4-D**
- Figure S1. Asymmetric unit of **Ru'2,4-D**
- Figure S2. Intra- and intermolecular interactions found in the structure of **Ru'2,4-D**
- Table S2. Selected bond distances and angles for **Ru'2,4-D**
- Table S3. Crystal and structure refinement data for **Ru'NAA**
- Figure S3. Intermolecular interactions found in the structure of **Ru'NAA**
- Table S4. Selected bond distances and angles for **Ru'NAA**

#### 2. MASS SPECTROMETRY

- Figure S4. ESI<sup>+</sup> spectra of **Ru'IAA**, **Ru'2,4-D** and **Ru'NAA**
- Figure S8. ESI<sup>-</sup> analyses of **Ru'2,4-D** and **Ru'2,4-D** after 24 h at pH = 6.5

#### 3. IR SPECTROSCOPY

- Figure S5. IR spectra of [Ru<sub>2</sub>Cl(μ-DAniF)<sub>3</sub>(μ-O<sub>2</sub>CMe)], [Ru<sub>2</sub>Cl<sub>2</sub>(μ-DAniF)<sub>3</sub>], **Ru'IAA**, **Ru'2,4-D** and **Ru'NAA**
- Table S5. Tentative assignment of the most relevant bands in the IR spectra of [Ru<sub>2</sub>Cl(μ-DPhF)<sub>3</sub>(μ-O<sub>2</sub>CMe)], [Ru<sub>2</sub>Cl(μ-DAniF)<sub>3</sub>(μ-O<sub>2</sub>CMe)], [Ru<sub>2</sub>Cl<sub>2</sub>(μ-DPhF)<sub>3</sub>], [Ru<sub>2</sub>Cl<sub>2</sub>(μ-DAniF)<sub>3</sub>], **RuIAA**, **Ru2,4-D**, **RuNAA**, **Ru'IAA**, **Ru'2,4-D** and **Ru'NAA**

#### 4. ELECTRONIC SPECTROSCOPY

- Figure S6. Electronic spectra of [Ru<sub>2</sub>Cl(μ-DAniF)<sub>3</sub>(μ-O<sub>2</sub>CMe)], **Ru'IAA**, **Ru'2,4-D**, **Ru'NAA** and [Ru<sub>2</sub>Cl(μ-DPhF)<sub>3</sub>(μ-O<sub>2</sub>CMe)]
- Table S6. Tentative assignment of the transitions observed in the electronic spectra of [Ru<sub>2</sub>Cl(μ-DPhF)<sub>3</sub>(μ-O<sub>2</sub>CMe)], **RuIAA**, **Ru2,4-D**, **RuNAA**, [Ru<sub>2</sub>Cl(μ-DAniF)<sub>3</sub>(μ-O<sub>2</sub>CMe)], **Ru'IAA**, **Ru'2,4-D** and **Ru'NAA**

- Figure S7. Electronic spectra of **RuNAA** and **Ru'NAA** in DMSO/water solution using an HEPES KOH (4-(2-hydroxyethyl)-1-piperazineethanesulfonic acid) buffer at pH 6.5 over 24 h.

## 5. MAGNETIC MEASUREMENTS

- Figure S9. Temperature dependence of the molar susceptibility  $\chi_M$  and  $\chi_M \cdot T$  for **Ru'IAA**
- Figure S10. Temperature dependence of the molar susceptibility  $\chi_M$  and  $\chi_M \cdot T$  for **Ru'2,4-D**
- Figure S11. Temperature dependence of the molar susceptibility  $\chi_M$  and  $\chi_M \cdot T$  for **Ru'NAA**
- Equations S1-S4 employed in the fitting of the magnetic data

## 6. BIOLOGICAL ASSAYS AND CHEMOMETRICS

- Table S7. Multifactorial ANOVA. Influence of pH and time on auxin activity
- Figure S12. Multifactor ANOVA plots. Factors evaluated and *p*-values obtained
- Figure S13. Variation of the auxin activity of the compounds as a function of pH and time.

## 1. SINGLE CRYSTAL X-RAY DIFFRACTION

Table S1. Crystal and structure refinement data for Ru'2,4-D.

|                                             |                                                                                               |
|---------------------------------------------|-----------------------------------------------------------------------------------------------|
| Empirical formula                           | C <sub>53</sub> H <sub>50</sub> Cl <sub>3</sub> N <sub>6</sub> O <sub>9</sub> Ru <sub>2</sub> |
| Formula weight                              | 1223.48                                                                                       |
| Temperature/K                               | 296.15                                                                                        |
| Crystal system                              | triclinic                                                                                     |
| Space group                                 | P-1                                                                                           |
| a/Å                                         | 11.869(2)                                                                                     |
| b/Å                                         | 15.027(3)                                                                                     |
| c/Å                                         | 16.745(3)                                                                                     |
| α/°                                         | 101.077(4)                                                                                    |
| β/°                                         | 107.283(3)                                                                                    |
| γ/°                                         | 106.402(3)                                                                                    |
| Volume/Å <sup>3</sup>                       | 2608.4(8)                                                                                     |
| Z                                           | 2                                                                                             |
| ρ <sub>calc</sub> /cm <sup>3</sup>          | 1.558                                                                                         |
| μ/mm <sup>-1</sup>                          | 0.795                                                                                         |
| F(000)                                      | 1242.0                                                                                        |
| Crystal size/mm <sup>3</sup>                | 0.34 × 0.2 × 0.07                                                                             |
| Radiation                                   | MoKα (λ = 0.71073)                                                                            |
| 2θ range for data collection/°              | 2.672 to 50.698                                                                               |
| Index ranges                                | -14 ≤ h ≤ 14, -18 ≤ k ≤ 18, -20 ≤ l ≤ 20                                                      |
| Reflections collected                       | 22965                                                                                         |
| Independent reflections                     | 9497 [R <sub>int</sub> = 0.0774, R <sub>sigma</sub> = 0.1203]                                 |
| Data/restraints/parameters                  | 9497/0/664                                                                                    |
| Goodness-of-fit on F <sup>2</sup>           | 0.971                                                                                         |
| Final R indexes [I ≥ 2σ (I)]                | R <sub>1</sub> = 0.0547, wR <sub>2</sub> = 0.1162                                             |
| Final R indexes [all data]                  | R <sub>1</sub> = 0.1270, wR <sub>2</sub> = 0.1498                                             |
| Largest diff. peak/hole / e Å <sup>-3</sup> | 0.96/-0.61                                                                                    |

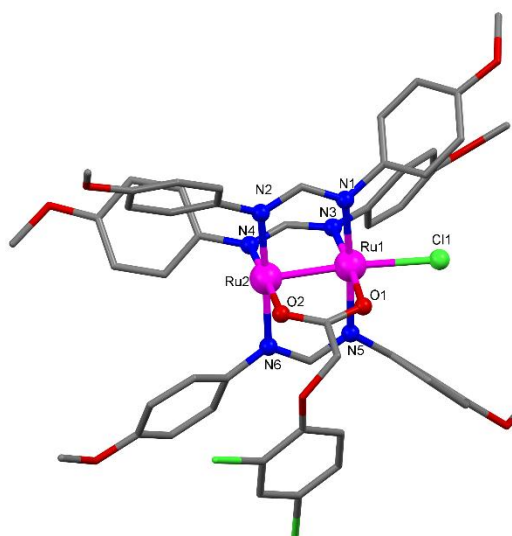

Figure S1. Asymmetric unit of Ru'2,4-D. Hydrogen atoms are omitted for clarity.

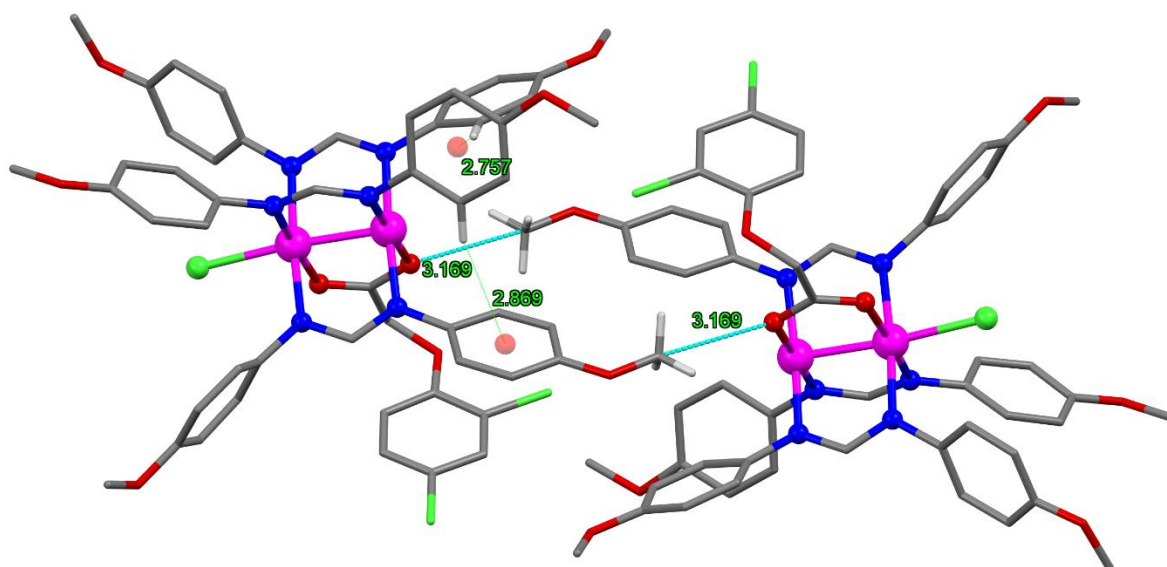

**Figure S2.** Intra- and intermolecular interactions found in the structure of **Ru'2,4-D** (distances in Å).

**Table S2.** Selected bond distances (Å) and angles (deg) for **Ru'2,4-D**.

|     |     |           |           |
|-----|-----|-----------|-----------|
| Ru1 | Ru2 | 2.3288(8) |           |
| Ru1 | Cl1 | 2.416(2)  |           |
| Ru1 | O1  | 2.113(5)  |           |
| Ru1 | N1  | 2.096(5)  |           |
| Ru1 | N3  | 2.060(6)  |           |
| Ru1 | N5  | 2.102(5)  |           |
| Ru2 | O2  | 2.068(5)  |           |
| Ru2 | N2  | 2.044(6)  |           |
| Ru2 | N4  | 2.005(6)  |           |
| Ru2 | N6  | 2.029(5)  |           |
| Ru1 | Ru2 | Cl1       | 173.69(5) |
| Ru1 | O1  | N3        | 176.1(2)  |
| Ru1 | N1  | N5        | 175.7(2)  |
| Ru2 | O2  | N4        | 178.4(2)  |
| Ru2 | N2  | N6        | 174.5(2)  |

**Table S3.** Crystal and structure refinement data for **Ru'NAA**.

|                                                   |                                                                                 |
|---------------------------------------------------|---------------------------------------------------------------------------------|
| <b>Empirical formula</b>                          | C <sub>57</sub> H <sub>54</sub> ClN <sub>6</sub> O <sub>8</sub> Ru <sub>2</sub> |
| <b>Formula weight</b>                             | 1188.65                                                                         |
| <b>Temperature/K</b>                              | 100.0                                                                           |
| <b>Crystal system</b>                             | triclinic                                                                       |
| <b>Space group</b>                                | P-1                                                                             |
| <b>a/Å</b>                                        | 10.3478(4)                                                                      |
| <b>b/Å</b>                                        | 16.5979(7)                                                                      |
| <b>c/Å</b>                                        | 16.8204(8)                                                                      |
| <b>α/°</b>                                        | 110.212(2)                                                                      |
| <b>β/°</b>                                        | 91.855(2)                                                                       |
| <b>γ/°</b>                                        | 104.522(2)                                                                      |
| <b>Volume/Å<sup>3</sup></b>                       | 2601.8(2)                                                                       |
| <b>Z</b>                                          | 2                                                                               |
| <b>ρ<sub>calc</sub>/g/cm<sup>3</sup></b>          | 1.517                                                                           |
| <b>μ/mm<sup>-1</sup></b>                          | 5.678                                                                           |
| <b>F(000)</b>                                     | 1214.0                                                                          |
| <b>Crystal size/mm<sup>3</sup></b>                | 0.21 × 0.04 × 0.02                                                              |
| <b>Radiation</b>                                  | CuKα (λ = 1.54178)                                                              |
| <b>2θ range for data collection/°</b>             | 5.648 to 136.49                                                                 |
| <b>Index ranges</b>                               | -11 ≤ h ≤ 12, -19 ≤ k ≤ 19, -20 ≤ l ≤ 20                                        |
| <b>Reflections collected</b>                      | 99612                                                                           |
| <b>Independent reflections</b>                    | 9537 [R <sub>int</sub> = 0.1196, R <sub>sigma</sub> = 0.0536]                   |
| <b>Data/restraints/parameters</b>                 | 9537/0/673                                                                      |
| <b>Goodness-of-fit on F<sup>2</sup></b>           | 1.041                                                                           |
| <b>Final R indexes [I &gt;= 2σ (I)]</b>           | R <sub>1</sub> = 0.0524, wR <sub>2</sub> = 0.1112                               |
| <b>Final R indexes [all data]</b>                 | R <sub>1</sub> = 0.0854, wR <sub>2</sub> = 0.1338                               |
| <b>Largest diff. peak/hole / e Å<sup>-3</sup></b> | 2.55/-1.03                                                                      |

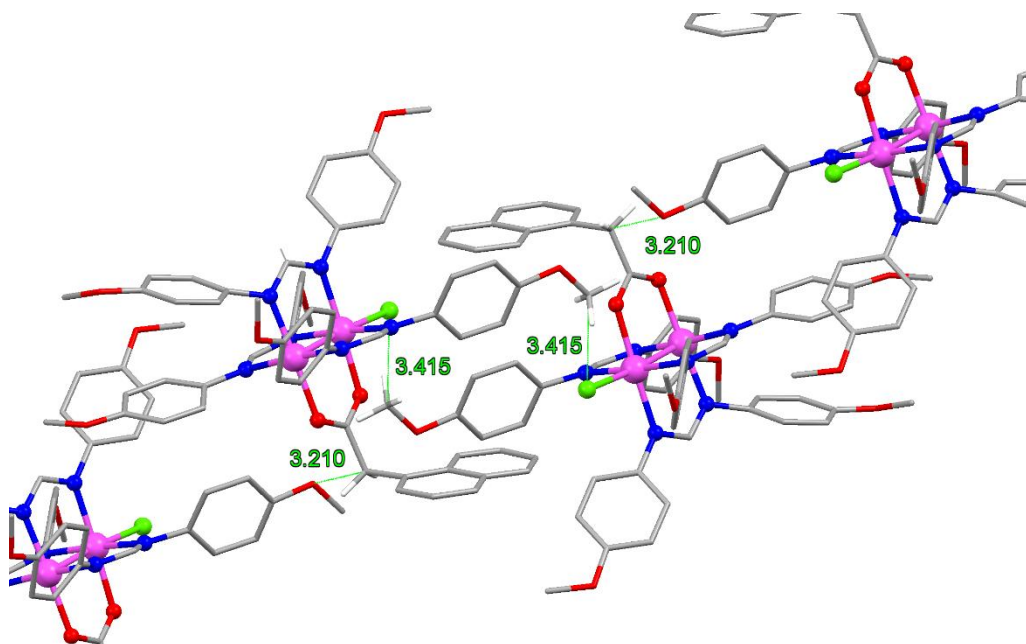

**Figure S3.** Intermolecular interactions found in the structure of **Ru'NAA** (distances in Å).

**Table S4.** Selected bond distances (Å) and angles (deg) for **Ru'NAA**.

|     |     |           |           |
|-----|-----|-----------|-----------|
| Ru1 | Ru2 | 2.3155(6) |           |
| Ru1 | Cl1 | 2.395(1)  |           |
| Ru1 | O1  | 2.079(4)  |           |
| Ru1 | N1  | 2.107(5)  |           |
| Ru1 | N3  | 2.083(4)  |           |
| Ru1 | N5  | 2.091(5)  |           |
| Ru2 | O2  | 2.066(4)  |           |
| Ru2 | N2  | 2.046(4)  |           |
| Ru2 | N4  | 2.024(4)  |           |
| Ru2 | N6  | 2.039(5)  |           |
| Ru1 | Ru2 | Cl1       | 173.92(4) |
| Ru1 | O1  | N3        | 177.0(2)  |
| Ru1 | N1  | N5        | 175.5(2)  |
| Ru2 | O2  | N4        | 178.5(2)  |
| Ru2 | N2  | N6        | 176.2(2)  |

## 2. MASS SPECTROMETRY

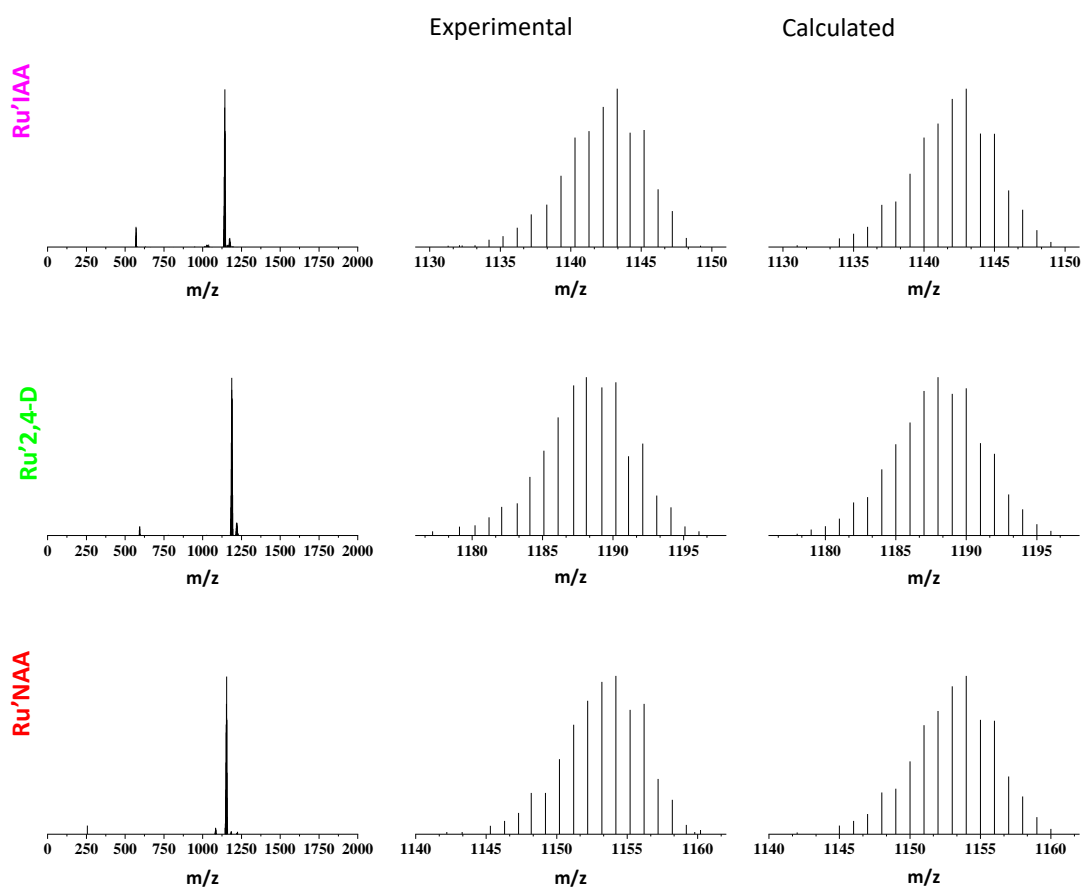

**Figure S4.** ESI<sup>+</sup> spectra of **Ru'IAA**, **Ru'2,4-D** and **Ru'NAA** (left). Enlargement of the peak corresponding to [M-Cl]<sup>+</sup> base peak (centre) and calculated spectra for the [M-Cl]<sup>+</sup> fragments (right) of **Ru'IAA** (top), **Ru'2,4-D** (middle) and **Ru'NAA** (bottom). Nominal molecular masses and distribution isotopes were calculated with the MASAS<sup>1</sup> software.

<sup>1</sup> F. A. Urbanos. Software MASAS, Universidad Complutense de Madrid: Madrid, 2002.

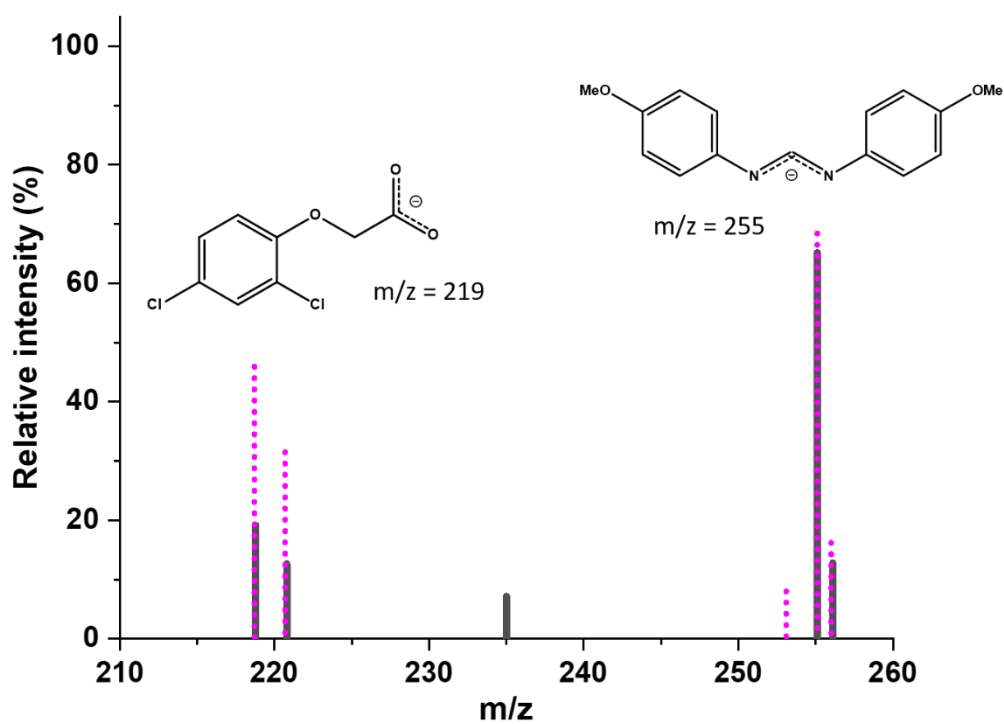

**Figure S8.** ESI<sup>-</sup> analyses of Ru'2,4-D (black) and Ru'2,4-D after 24 h at pH = 6.5 (pink). Both samples were dissolved in methanol. The second one was slightly acidified with HCl keeping the pH at 6.5. The intensities of both spectra were normalized to their base peak, which is the same in both cases.



### 3. IR SPECTROSCOPY

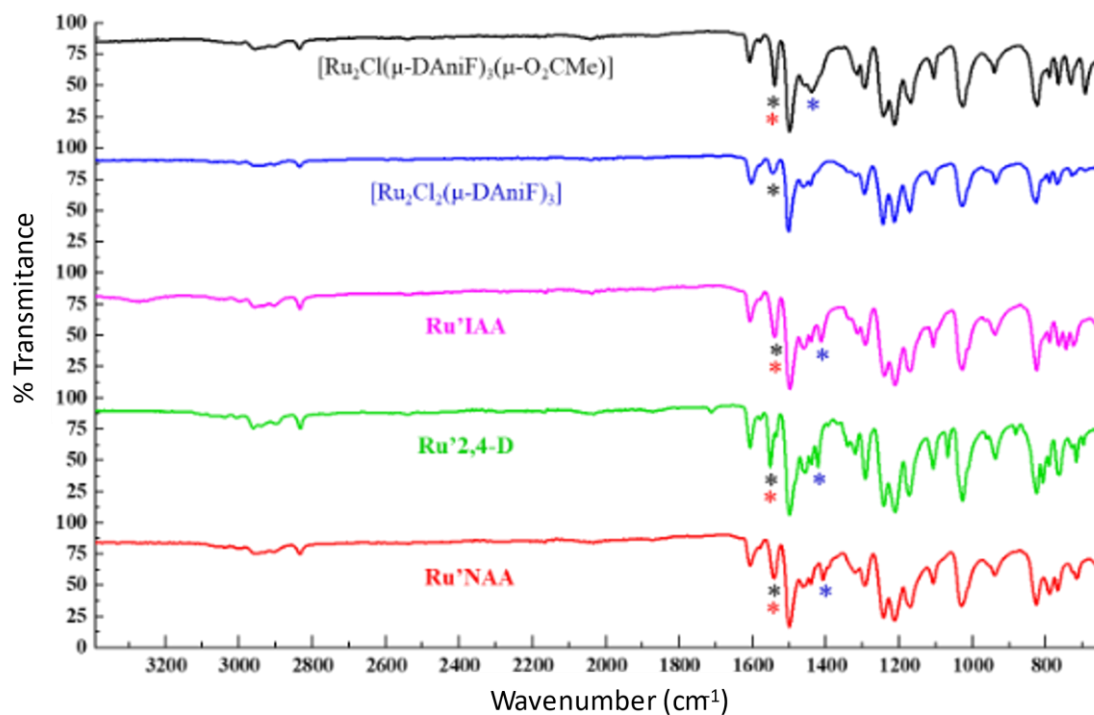

**Figure S5.** IR spectra of [Ru<sub>2</sub>Cl(μ-DAniF)<sub>3</sub>(μ-O<sub>2</sub>CMe)] (black), [Ru<sub>2</sub>Cl<sub>2</sub>(μ-DAniF)<sub>3</sub>] (blue), **Ru'IAA** (pink), **Ru'2,4-D** (blue) and **Ru'NAA** (red). The antisymmetric O-C-O stretching bands are marked with a red asterisk, the symmetric O-C-O stretching bands with a blue asterisk and the N-C-N stretching bands with a black asterisk.

**Table S5.** Tentative assignment of the most relevant bands ( $\text{cm}^{-1}$ ) in the IR spectra of  $[\text{Ru}_2\text{Cl}(\mu\text{-DPhF})_3(\mu\text{-O}_2\text{CMe})]$ ,  $[\text{Ru}_2\text{Cl}(\mu\text{-DAniF})_3(\mu\text{-O}_2\text{CMe})]$ ,  $[\text{Ru}_2\text{Cl}_2(\mu\text{-DPhF})_3]$ ,  $[\text{Ru}_2\text{Cl}_2(\mu\text{-DAniF})_3]$ , **RuIAA**, **Ru2,4-D**, **RuNAA**, **Ru'IAA**, **Ru'2,4-D** and **Ru'NAA**.

| Compound                                                               | $\nu$ N-H | $\nu$ C <sub>ar</sub> -H | $\nu_{\text{as}}$ C-H | $\nu_{\text{s}}$ C-H | $\nu$ C=C <sub>ar</sub> | $\nu_{\text{as}}$ O-C-O + $\nu$ N-C-N | $\nu_{\text{s}}$ O-C-O | $\nu$ C-N    | $\Delta$ ( $\nu_{\text{as}}$ - $\nu_{\text{s}}$ O-C-O) |
|------------------------------------------------------------------------|-----------|--------------------------|-----------------------|----------------------|-------------------------|---------------------------------------|------------------------|--------------|--------------------------------------------------------|
| $[\text{Ru}_2\text{Cl}(\mu\text{-DPhF})_3(\mu\text{-O}_2\text{CMe})]$  | -         | 3057                     | 2957                  | -                    | 1592<br>1485            | 1529                                  | 1430                   | 1308<br>1211 | 99                                                     |
| $[\text{Ru}_2\text{Cl}(\mu\text{-DAniF})_3(\mu\text{-O}_2\text{CMe})]$ | -         | 3005                     | 2957                  | 2835                 | 1607<br>1578<br>1484    | 1540                                  | 1438                   | 1292<br>1212 | 102                                                    |
| $[\text{Ru}_2\text{Cl}_2(\mu\text{-DPhF})_3]$                          | -         | 3063                     | 2951                  | -                    | 1591<br>1582<br>1484    | 1520*                                 | -                      | 1312<br>1208 | -                                                      |
| $[\text{Ru}_2\text{Cl}_2(\mu\text{-DAniF})_3]$                         | -         | 3042                     | 2944                  | 2834                 | 1602<br>1498            | 1539*                                 | -                      | 1294<br>1210 | -                                                      |
| <b>RuIAA</b>                                                           | 3260      | 3056                     | 2965                  | -                    | 1595<br>1485            | 1530                                  | 1408                   | 1317<br>1214 | 122                                                    |
| <b>Ru2,4-D</b>                                                         | -         | 3060                     | 2968                  | -                    | 1592<br>1486            | 1547                                  | 1426                   | 1317<br>1219 | 121                                                    |
| <b>RuNAA</b>                                                           | -         | 3056                     | 2954                  | -                    | 1593<br>1486            | 1531                                  | 1408                   | 1318<br>1220 | 123                                                    |
| <b>Ru'IAA</b>                                                          | 3276      | 3039                     | 2957                  | 2833                 | 1606<br>1497            | 1540                                  | 1412                   | 1291<br>1239 | 138                                                    |
| <b>Ru'2,4-D</b>                                                        | -         | 3039                     | 2959                  | 2832                 | 1606<br>1497            | 1551                                  | 1421                   | 1291<br>1210 | 130                                                    |
| <b>Ru'NAA</b>                                                          | -         | 3036                     | 2954                  | 2833                 | 1606<br>1499            | 1541                                  | 1407                   | 1292<br>1212 | 134                                                    |

\*Corresponds only to  $\nu_{\text{as}}$  O-C-O.

#### 4. ELECTRONIC SPECTROSCOPY

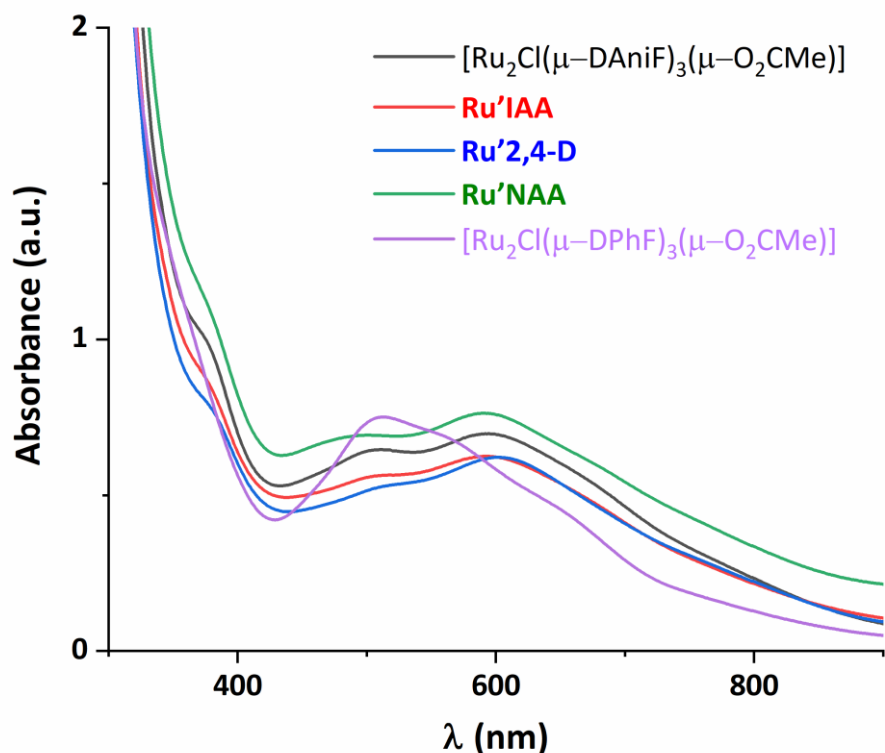

**Figure S6.** Electronic spectra of  $[\text{Ru}_2\text{Cl}(\mu\text{-DAniF})_3(\mu\text{-O}_2\text{CMe})]$  (black), **Ru'IAA** (red), **Ru'2,4-D** (blue), **Ru'NAA** (green) and  $[\text{Ru}_2\text{Cl}(\mu\text{-DPhF})_3(\mu\text{-O}_2\text{CMe})]$  (purple).

**Table S6.** Tentative assignment, of the transitions (nm) observed in the electronic spectra of  $[\text{Ru}_2\text{Cl}(\mu\text{-DPhF})_3(\mu\text{-O}_2\text{CMe})]$ , **RuIAA**, **Ru2,4-D**, **RuNAA**,  $[\text{Ru}_2\text{Cl}(\mu\text{-DAniF})_3(\mu\text{-O}_2\text{CMe})]$ , **Ru'IAA**, **Ru'2,4-D** and **Ru'NAA**.<sup>2</sup>

| Transition                                                             | LMCT $\pi(\text{Cl}) \rightarrow \pi^*(\text{Ru}_2)$ | $\pi(\text{RuO/N, Ru}_2) \rightarrow \pi^*(\text{Ru}_2)$ | $\pi^*(\text{Ru}_2) \rightarrow \sigma^*(\text{RuO/N})$ | $\delta(\text{Ru}_2) \rightarrow \pi^*(\text{Ru}_2)$ |
|------------------------------------------------------------------------|------------------------------------------------------|----------------------------------------------------------|---------------------------------------------------------|------------------------------------------------------|
| $[\text{Ru}_2\text{Cl}(\mu\text{-DPhF})_3(\mu\text{-O}_2\text{CMe})]$  | 340 sh                                               | 515                                                      | 565 sh                                                  | 665 sh                                               |
| <b>RuIAA</b>                                                           | 335 sh                                               | 517                                                      | 570 sh                                                  | 640 sh                                               |
| <b>Ru2,4-D</b>                                                         | 340 sh                                               | 527                                                      | 570 sh                                                  | 640 sh                                               |
| <b>RuNAA</b>                                                           | 340 sh                                               | 525                                                      | 570 sh                                                  | 640 sh                                               |
| $[\text{Ru}_2\text{Cl}(\mu\text{-DAniF})_3(\mu\text{-O}_2\text{CMe})]$ | 380 sh                                               | 511                                                      | 594                                                     | 690 sh                                               |
| <b>Ru'IAA</b>                                                          | 385 sh                                               | 498                                                      | 594                                                     | 690 sh                                               |
| <b>Ru'2,4-D</b>                                                        | 385 sh                                               | 478 sh                                                   | 603                                                     | 690 sh                                               |
| <b>Ru'NAA</b>                                                          | 360 sh                                               | 500                                                      | 590                                                     | 690 sh                                               |

<sup>2</sup> (a) Lin, C.; Ren, T.; Valente, E. J.; Zubkowsky, J. D.; Smith, E. T. *Chem. Lett.* **1997**, 26 (8), 753–754. (b) Barral, M. C.; Herrero, S.; Jiménez-Aparicio, R.; Torres, M. R.; Urbanos, F. A. *Angew. Chem. Int. Ed.* **2005**, 44 (2), 305–307. (c) Chen, W.-Z.; Ren, T. *Organometallics* **2005**, 24 (11), 2660–2669. (d) Bear, J. L.; Han, B.; Huang, S.; Kadish, K. M. *Inorg. Chem.* **1996**, 35 (10), 3012–3021. (e) Castro, M. A.; Roitberg, A. E.; Cukiernik, F. D. *Inorg. Chem.* **2008**, 47 (11), 4682–4690.

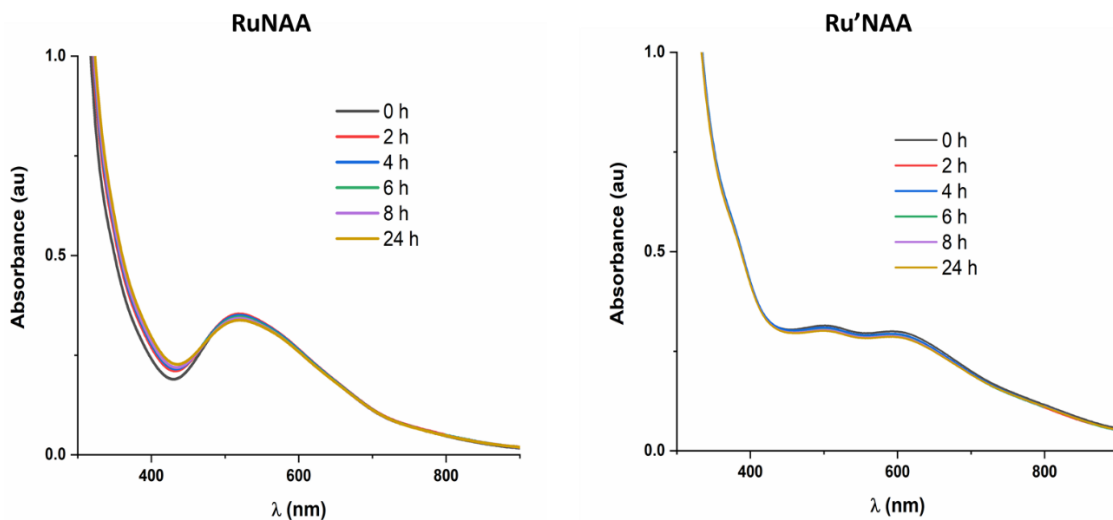

**Figure S7.** Electronic spectra of RuNAA (left) and Ru'NAA (right) in DMSO/water solution using an HEPES KOH (4-(2-hydroxyethyl)-1-piperazineethanesulfonic acid) buffer at pH 6.5 over 24 h.

## 5. MAGNETIC MEASUREMENTS

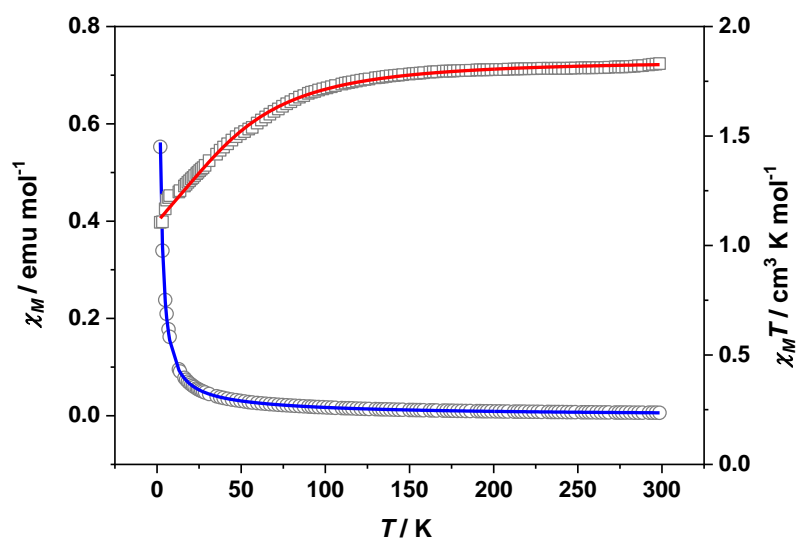

**Figure S9.** Temperature dependence of the molar susceptibility  $\chi_M$  (circles) and  $\chi_M T$  (squares) for Ru'IAA. Solid lines are the best fit to the data as described in the text.

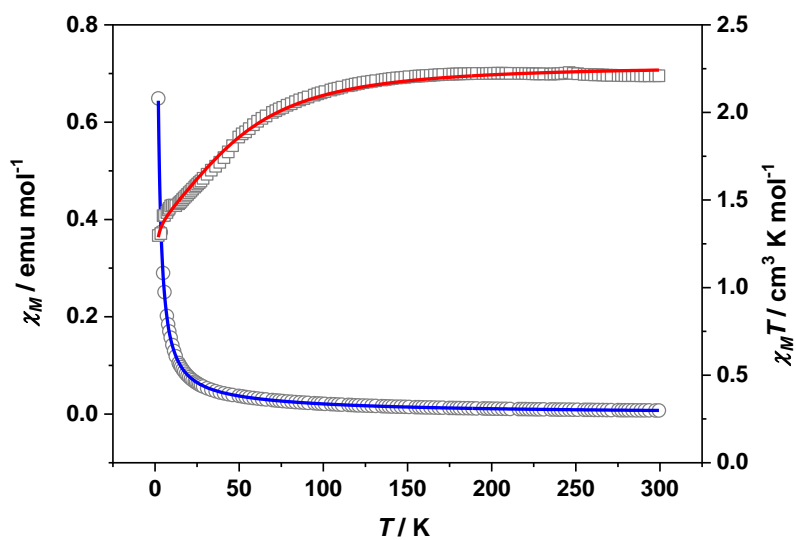

**Figure S10.** Temperature dependence of the molar susceptibility  $\chi_M$  (circles) and  $\chi_M \cdot T$  (squares) for Ru'2,4-D. Solid lines are the best fit to the data as described in the text.

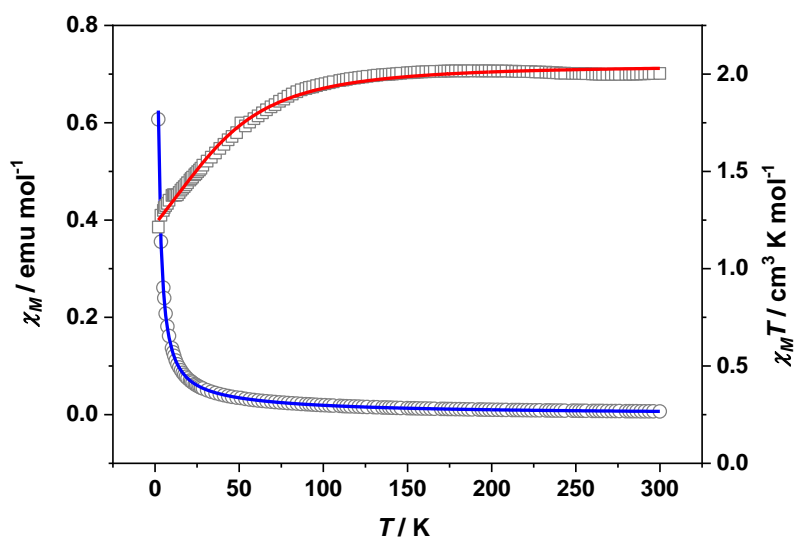

**Figure S11.** Temperature dependence of the molar susceptibility  $\chi_M$  (circles) and  $\chi_M \cdot T$  (squares) for Ru'NAA. Solid lines are the best fit to the data as described in the text.

**Equations employed in the fitting of the magnetic data:**

$$\chi_M = \frac{\chi_{\parallel} + 2\chi_{\perp}}{3}$$

**Equation S1**

$$\chi_{\parallel} = \left( \frac{Ng^2\beta^2}{k_B T} \right) \left[ \frac{1 + 9 \exp(-2D/k_B T)}{4(1 + \exp(-2D/k_B T))} \right]$$

**Equation S2**

$$\chi_{\perp} = \left( \frac{Ng^2\beta^2}{k_B T} \right) \left[ \frac{4 + \left( \frac{3k_B T}{D} \right) (1 - \exp(-2D/k_B T))}{4(1 + \exp(-2D/k_B T))} \right]$$

**Equation S3**

$$\chi_M' = \frac{\chi_M}{1 - \left( \frac{2ZJ}{Ng^2\beta^2} \right) \chi_M}$$

**Equation S4**

( $N$ ,  $g$ ,  $\beta$ , and  $k_B$  have their usual meanings)

## 6. BIOLOGICAL ASSAYS AND CHEMOMETRICS

**Table S7.** Multifactorial ANOVA.<sup>3</sup> Influence of pH and time on auxin activity.

| <b>2,4-D</b>               |                |    |             |         |                 |
|----------------------------|----------------|----|-------------|---------|-----------------|
| Source                     | Sum of squares | Df | Mean square | F-ratio | <i>p</i> -value |
| Main effects (pH)          | 0.0472109      | 2  | 0.0236054   | 115.81  | 0.0000          |
| Main effect (time, h)      | 0.700818       | 2  | 0.350409    | 1710.06 | 0.0000          |
| Interactions (pH-time)     | 0.0455153      | 4  | 0.0113788   | 55.82   | 0.0000          |
| <b>Ru<sub>2,4-D</sub></b>  |                |    |             |         |                 |
| Source                     | Sum of squares | Df | Mean square | F-ratio | <i>p</i> -value |
| Main effects (pH)          | 0.0528029      | 2  | 0.0264014   | 20.19   | 0.0000          |
| Main effect (time, h)      | 0.426837       | 2  | 0.213418    | 163.20  | 0.0000          |
| Interactions (pH-time)     | 0.00732122     | 4  | 0.0183031   | 14.00   | 0.0000          |
| <b>Ru'<sub>2,4-D</sub></b> |                |    |             |         |                 |
| Source                     | Sum of squares | Df | Mean square | F-ratio | <i>p</i> -value |
| Main effects (pH)          | 0.0708965      | 2  | 0.0354482   | 202.64  | 0.0000          |
| Main effect (time, h)      | 0.74159        | 2  | 0.370795    | 2119.69 | 0.0000          |
| Interactions (pH-time)     | 0.0877365      | 4  | 0.02119341  | 125.39  | 0.0000          |
| <b>NAA</b>                 |                |    |             |         |                 |
| Source                     | Sum of squares | Df | Mean square | F-ratio | <i>p</i> -value |
| Main effects (pH)          | 0.0659725      | 2  | 0.0329862   | 11.64   | 0.0009          |
| Main effect (time, h)      | 0.804324       | 2  | 0.402162    | 141.90  | 0.0000          |
| Interactions (pH-time)     | 0.060053       | 4  | 0.0150133   | 5.30    | 0.0073          |
| <b>RuNAA</b>               |                |    |             |         |                 |
| Source                     | Sum of squares | Df | Mean square | F-ratio | <i>p</i> -value |
| Main effects (pH)          | 0.0838757      | 2  | 0.041937    | 233.62  | 0.0000          |
| Main effect (time, h)      | 0.355385       | 2  | 0.177692    | 989.84  | 0.0000          |
| Interactions (pH-time)     | 0.0923937      | 4  | 0.0230984   | 128.67  | 0.0000          |
| <b>Ru'NAA</b>              |                |    |             |         |                 |
| Source                     | Sum of squares | Df | Mean square | F-ratio | <i>p</i> -value |
| Main effects (pH)          | 0.0734904      | 2  | 0.0367452   | 25.392  | 0.0000          |
| Main effect (time, h)      | 0.416898       | 2  | 0.208449    | 144.03  | 0.0000          |
| Interactions (pH-time)     | 0.0668784      | 4  | 0.0167196   | 11.55   | 0.0001          |

<sup>3</sup> C. Mongay Fernández, *Quimiometría*, UNIVERSITAT DE VALÈNCIA, 2014.

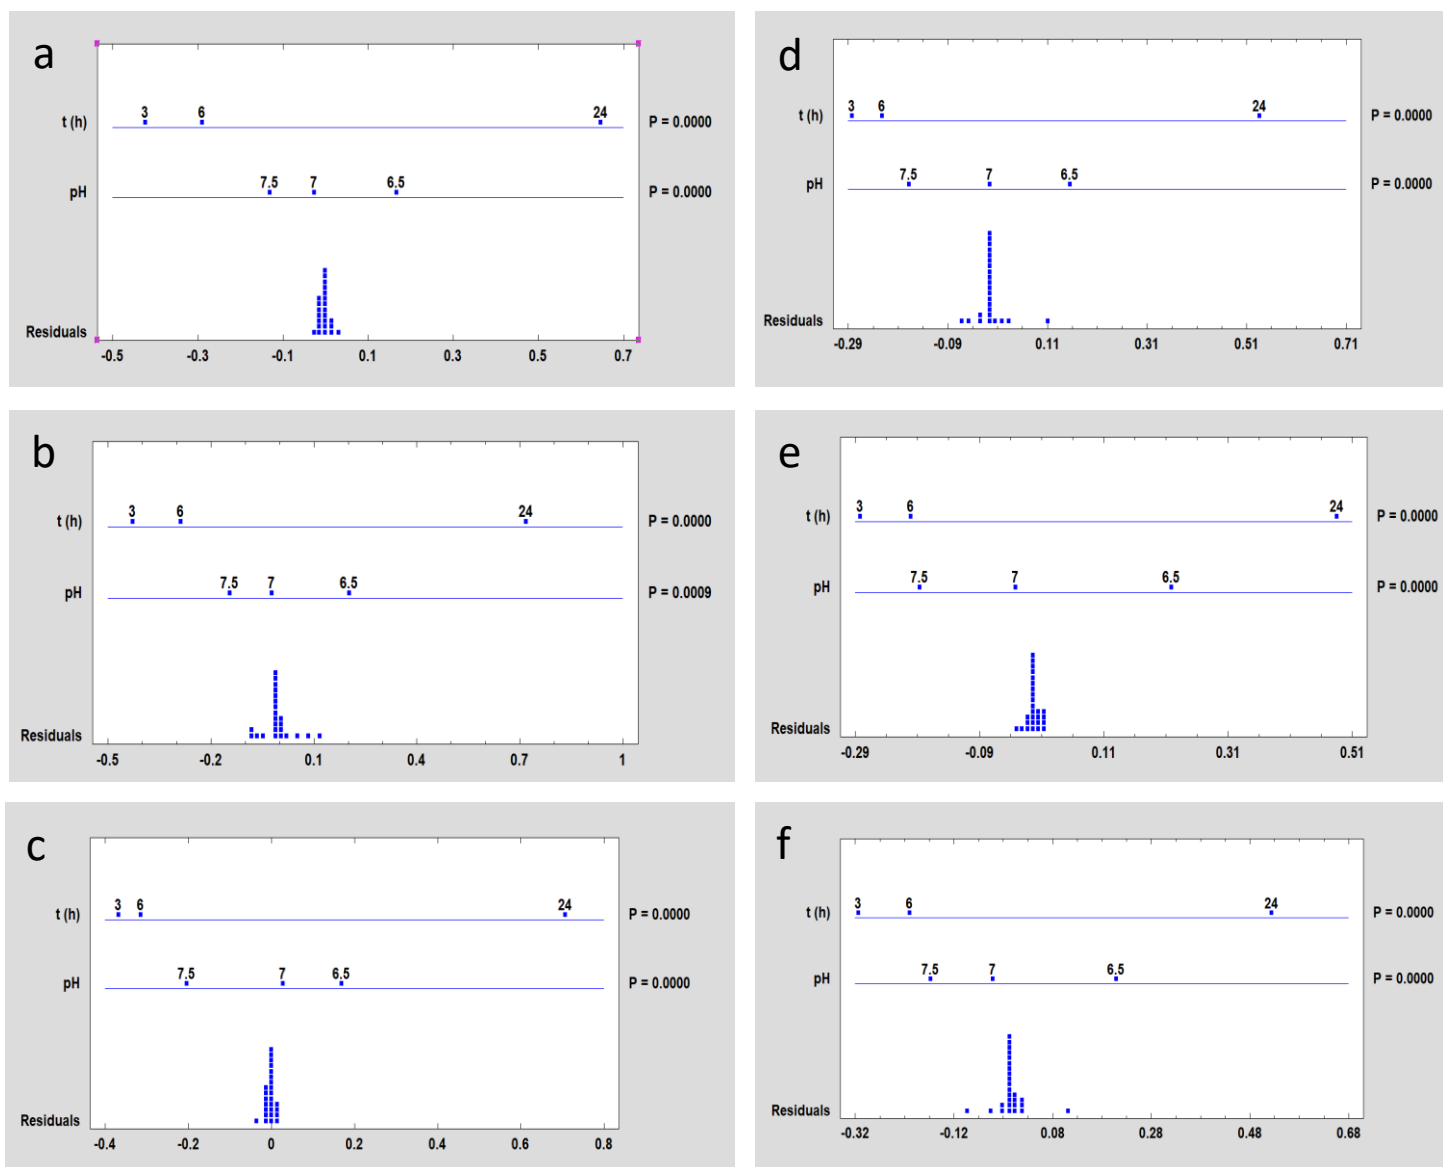

**Figure S12.** Multifactor ANOVA plots. Factors evaluated and *p*-values obtained. a) 2,4 D; b) Ru<sub>2</sub>,4-D; c) Ru'<sub>2</sub>,4-D; d) NAA; e) RuNAA; f) Ru'<sub>2</sub>NAA.



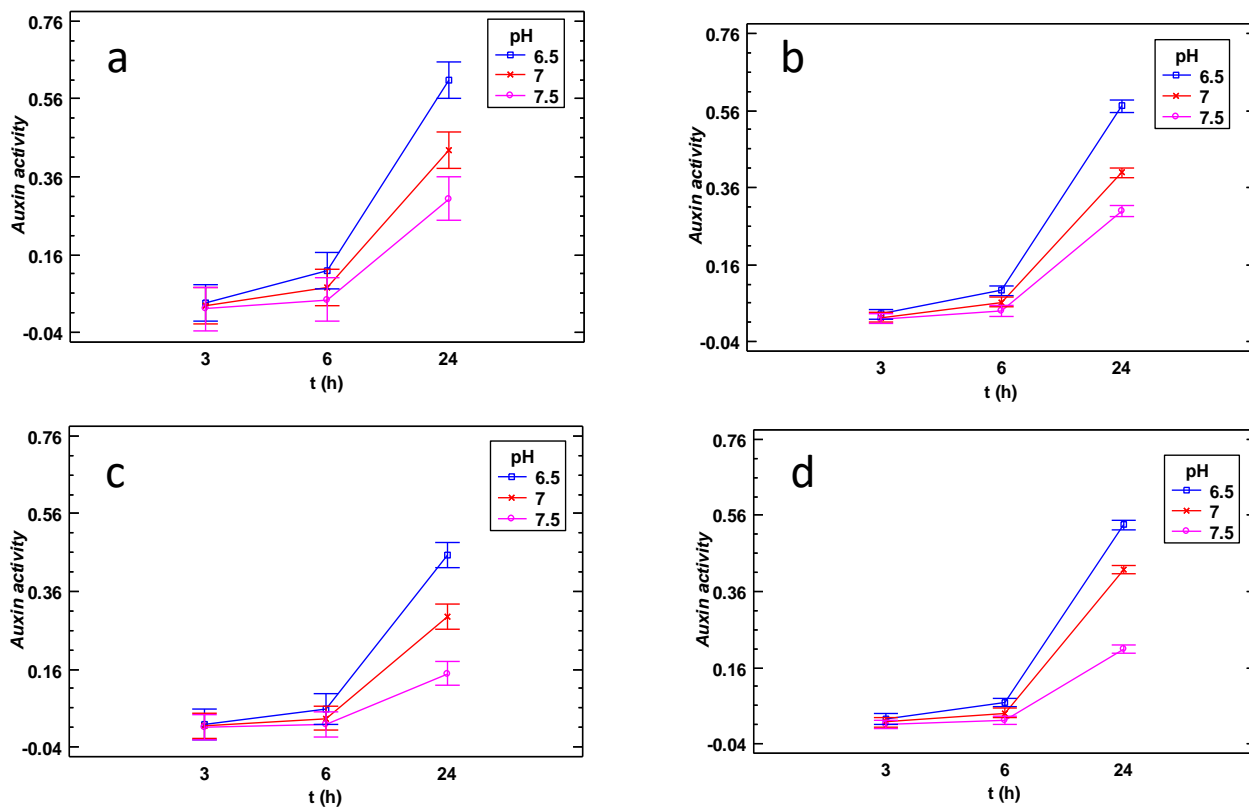

**Figure S13.** a) Variation of the auxin activity of NAA as a function of pH and time (the pH time cross-dependence is not observed for RuNAA and Ru'NAA). b) Variation of the auxin activity as a function of pH and time of 2,4-D. c) Variation of the auxin activity as a function of pH and time of Ru2,4-D. d) Variation of the auxin activity as a function of pH and time of Ru'2,4-D. Intervals have been estimated using the LSD statistic at 95% probability. Auxin activity is measured in 4-MU nmol·min<sup>-1</sup>·μg<sup>-1</sup> protein.
